# Supplementary material
Source: HighWire-hosted journal article supplement (https://rapm.bmj.com/highwire/filestream/16159/field_highwire_adjunct_files/0/rapm-2021-103007supp001_data_supplement.pdf)
Supplement: rapm-2021-103007supp001_data_supplement.pdf [file rapm-2021-103007supp001_data_supplement.pdf]

**Appendix A****Ad-Hoc Working Group on OUD Participating Societies**

ASRA President: Eugene Viscusi, MD

Chair: Lynn Kohan, MD

American Society of Regional Anesthesia: Sudheer Potru, DO, Olabisi Lane, MD

American Society of Anesthesiologists: Anuj Aryal, MD, Antje Barreveld, MD

American Academy of Pain Medicine: Trent Emerick, MD

American Society of Addiction Medicine: Michael Sprintz, DO, Trent Emerick, MD

American Society of Health-System Pharmacists: Sophia Chhay, PharmD, Anna Dopp, PharmD
